# Supplementary material for: Ambient pressure synthesis of MIL-100(Fe) MOF from homogeneous solution using a redox pathway
Source: Royal Society of Chemistry journal article supplement (doi:10.1039/c6dt01179a), 2016-01-01
Supplement: c6dt01179a1.pdf [file c6dt01179a1.pdf]

## SUPPORTING INFORMATION

### Ambient pressure synthesis of MIL-100(Fe) MOF from homogeneous solution using a redox pathway

Felix Jeremias,<sup>a</sup> Stefan K. Henninger<sup>a,\*</sup> and Christoph Janiak<sup>b,\*</sup>

a) Department of Thermally Active Materials and Solar Cooling, Fraunhofer Institute for Solar Energy Systems (ISE), Heidenhofstr. 2, 79110 Freiburg, Germany

b) Institut für Anorganische Chemie und Strukturchemie, Universität Düsseldorf, 40204 Düsseldorf, Germany

Emails: [felix.jeremias@ise.fraunhofer.de](mailto:felix.jeremias@ise.fraunhofer.de); [stefan.henninger@ise.fraunhofer.de](mailto:stefan.henninger@ise.fraunhofer.de); [janiak@uni-duesseldorf.de](mailto:janiak@uni-duesseldorf.de)

#### Experimental Procedure

*Note:* DMSO and iron(III) nitrate are listed as incompatible chemicals. Precipitation of  $\text{Fe}(\text{NO}_3)_3 \cdot 6 \text{DMSO}$  (yellow crystals) was observed if the fresh reaction mixture was allowed to sit at RT over a longer period, especially if the prescribed water content was not maintained.  $\text{Fe}(\text{NO}_3)_3 \cdot 6 \text{DMSO}$  was patented as an explosive.

#### Reagents and Reactants

*Benzene-1,3,5-tricarboxylic acid (trimesic acid,  $\geq 98\%$ , TCI)* was used as received.

*Ethanol (96%, Carl Roth, 1% methyl ethyl ketone)* was distilled prior to use.

*N,N-dimethyl formamide ( $\geq 99.9\%$ , anhydrous, BDH Prolabo)* was distilled prior to use. The first and the last 10% of the distillate were discarded.

*Dimethylsulfoxide ( $\geq 99.5\%$ , Carl Roth)* was used as received. After opening, bottles were used within 2 weeks.

*Iron(III)-nitrate nonahydrate ( $\geq 96\%$ , Carl Roth), iron(III)-sulfate nonahydrate (reagent quality, VWR chemicals) and iron(III)-chloride hexahydrate ( $\geq 98\%$ , Carl Roth)* were used as received.

#### Preparation of the metal salt solutions

*Iron(III) nitrate:* 3.24 g of iron(III) nitrate nonahydrate (8 mmol) were dissolved in 8 mL of deionized water. pH = 0.

*Iron(III) chloride:* 2.16 g of iron(III) chloride hexahydrate (8 mmol) were dissolved in 8 mL of deionized water. pH = 0 was adjusted with conc. hydrochloric acid.

*Iron(III) mesylate:* To a solution of 3.24 g (8 mmol) of iron(III) nitrate nonahydrate ( $\geq 96\%$ , Carl Roth) in 30 ml of deionized water, ammonium hydroxide solution (25%) was added in drops until no further precipitation of  $\text{Fe(O)(OH)}$  could be noticed and  $\text{pH} \geq 10$  was achieved. The resulting solid was removed by centrifugation, thoroughly washed with deionized water until  $\text{pH} = 7$  and finally redispersed in 8 ml of deionized water. 1.56 mL (24 mmol) of methanesulfonic acid were added. The mixture turned clear.  $\text{pH} = 0$  was adjusted with methanesulfonic acid.

*Iron(III) sulfate / hydrogen sulfate buffer system:* To a solution of 2.25 g (4 mmol) of iron(III) sulfate hydrate in 8 mL of deionized water, 12 mmol (1.18 g), 8 mmol (0.78 g), or 4 mmol (0.39 g) of conc. sulfuric acid were added.  $\text{pH} = 0$  was adjusted with conc. sulfuric acid.

### PXRD of $[\text{Fe}(\text{DMSO})_6](\text{NO}_3)_3$

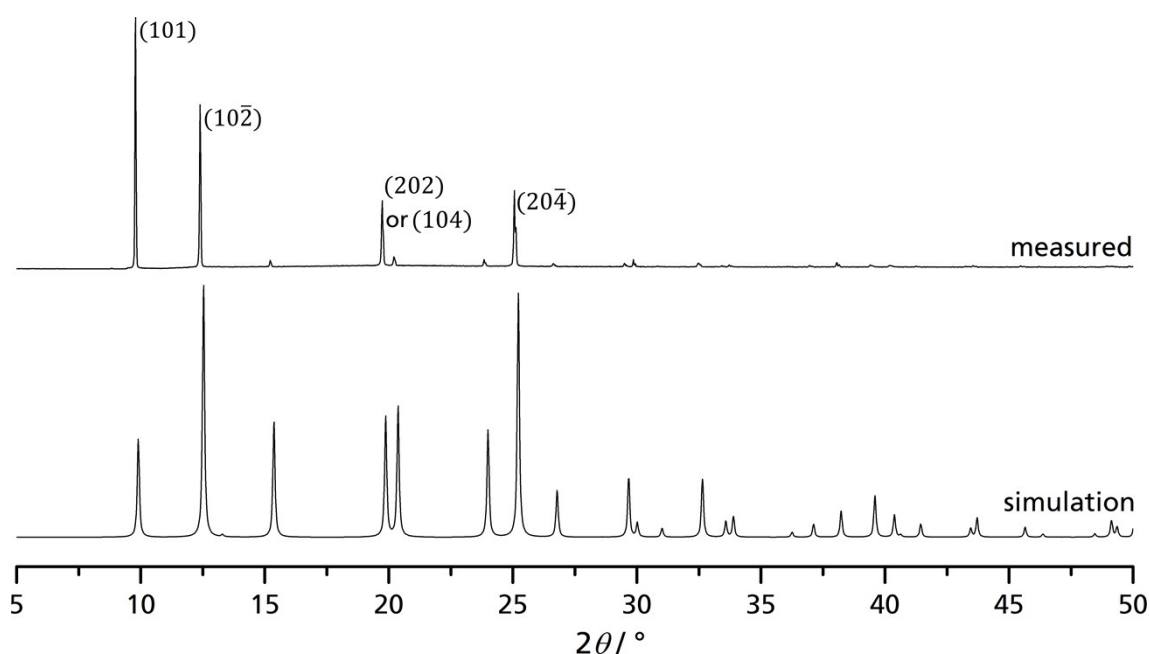

**Figure S1** Comparison of the PXRDs acquired for the precipitated crystals with cif-file simulation for  $\text{Fe}(\text{NO}_3)_3 \cdot 6 \text{DMSO}$  (CCDC-No. 125872).<sup>1</sup> Indices are given for intense reflections. Cu-K $\alpha$  radiation. Note: Preparation and handling (grinding etc.) of this compound is strongly discouraged.

<sup>1</sup> J. R. Tzou, M. Mullaney, R. E. Norman and S. C. Chang, *Acta Crystallogr. C*, 1995, **51**, 2249-2252. DOI: 10.1107/s0108270195005695

## Boiling curve DMSO-water

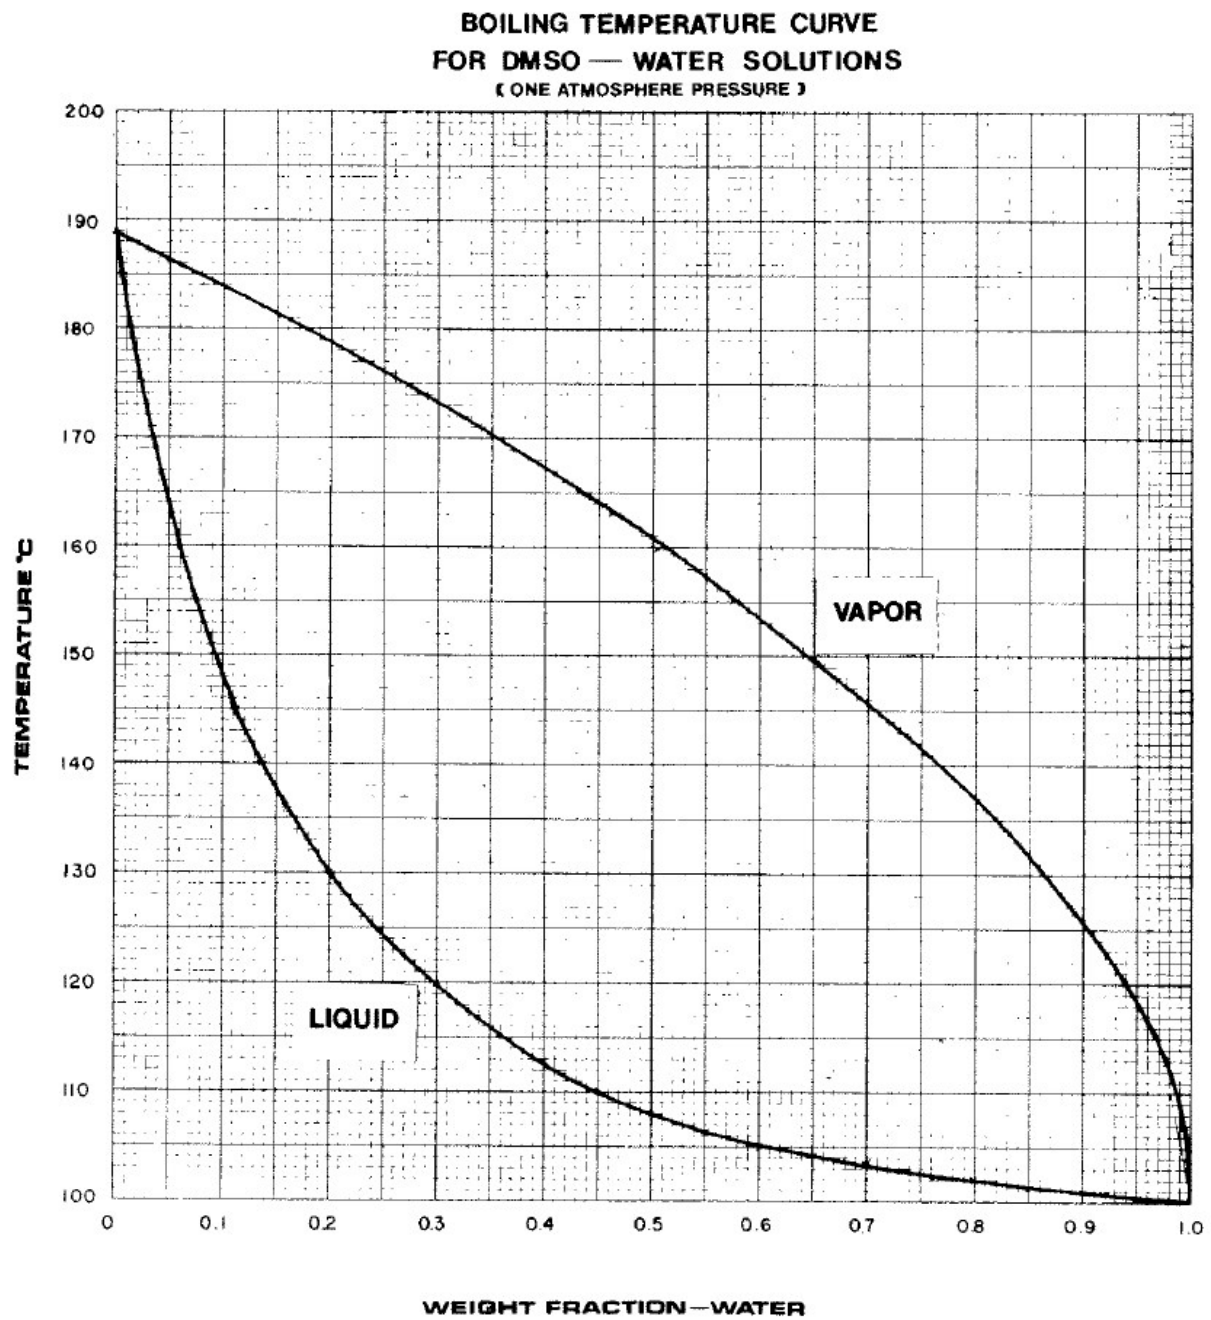

**Figure S2** Boiling curve of DMSO/water mixtures. Retrieved from: Gaylord Chemical, Dimethyl Sulfoxide (DMSO) Physical Properties - Bulletin # 101, <http://www.gaylordchemical.com/65-2/literature/101b-dms0-physical-properties/>, 2005.

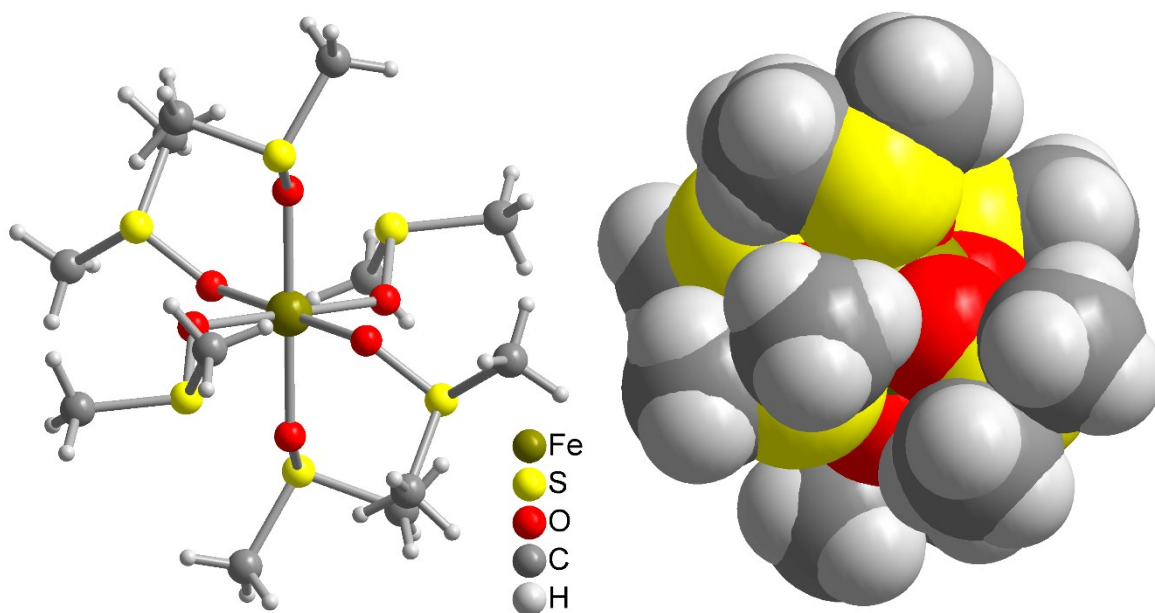

**Figure S3** Molecular structure of the  $[\text{Fe}(\text{DMSO})_6]^{3+}$  cation in  $[\text{Fe}(\text{DMSO})_6](\text{NO}_3)_3$  (=  $\text{Fe}(\text{NO}_3)_3 \cdot 6 \text{DMSO}$ ). Drawing prepared from deposited cif-file (CCDC-No. 125872).<sup>1</sup>
